# Supplementary material for: STRA6 and Placental Retinoid Metabolism in Gestational Diabetes Mellitus
Source: MDPI journal article supplement (doi:10.3390/jpm11121301), 2021-12-05
Supplement: s1 [file s1]

**Table S1-** Here are listed the primer sequences used.

| Primer sequence (5' to 3') | Primer name          |
|----------------------------|----------------------|
| TGCTGCTGTTTTTCATGGTCC      | STRA6 (Hu) FW        |
| TGGAGCCTCAGTTTTCCCAT       | STRA6 (Hu) RW        |
| GGCTGATCAGGTGTCGGAAA       | LRP1 (Hu) FW         |
| GTCACCGTTGTTGACACTGC       | LRP1 (Hu) RW         |
| AGTATGTAACCAGGAGCAGGAC     | VLDLR (Hu) FW        |
| CACAGTCACACTCGTAGCCTAT     | VLDLR (Hu) RW        |
| CGATGAGTGTCAGGATCCCG       | LDLR (Hu) FW         |
| GAAGAGGTAGGCGATGGAGC       | LDLR (Hu) RW         |
| CGAGCGCTCCATTCATCTCT       | LPL (Hu) FW          |
| CCAGATTGTTGCAGCGGTTC       | LPL (Hu) RW          |
| TCTCTACTCGGGTTCTGGCA       | MTTP (Hu) FW         |
| AGGTGACAGGTCTGAGCTGA       | MTTP (Hu) RW         |
| CTCTGACTTCAACAGCGACAC      | GAPDH (Hu) FW        |
| AGCCAAATTCGTTGTCATACCAG    | GAPDH (Hu) RW        |
| CTTGCAACTATCCGACCTGC       | LRP2 (Hu) FW         |
| GGACCGCTTTCACATCCATC       | LRP2 (Hu) RW         |
| CTACGTGGAGGCAAACATGG       | RXR $\alpha$ (Hu) FW |
| CAGCTCTGAGAAGTGTGGGA       | RXR $\alpha$ (Hu) RW |
| ATACTCTTGCCGGGACAACA       | RXR $\beta$ (Hu) FW  |
| TCCCCATCCTTGTCCTTTCC       | RXR $\beta$ (Hu) RW  |
